# Supplementary material for: GLI1 regulates a novel neuropilin-2/α6β1 integrin based autocrine pathway that contributes to breast cancer initiation
Source: PubMed Central journal article supplement (PMC3628099; doi:10.1002/emmm.201202078), 2013-02-21
Supplement: emmm0005-0488-sd2.pdf [file emmm0005-0488-sd2.pdf]

Fig. S1

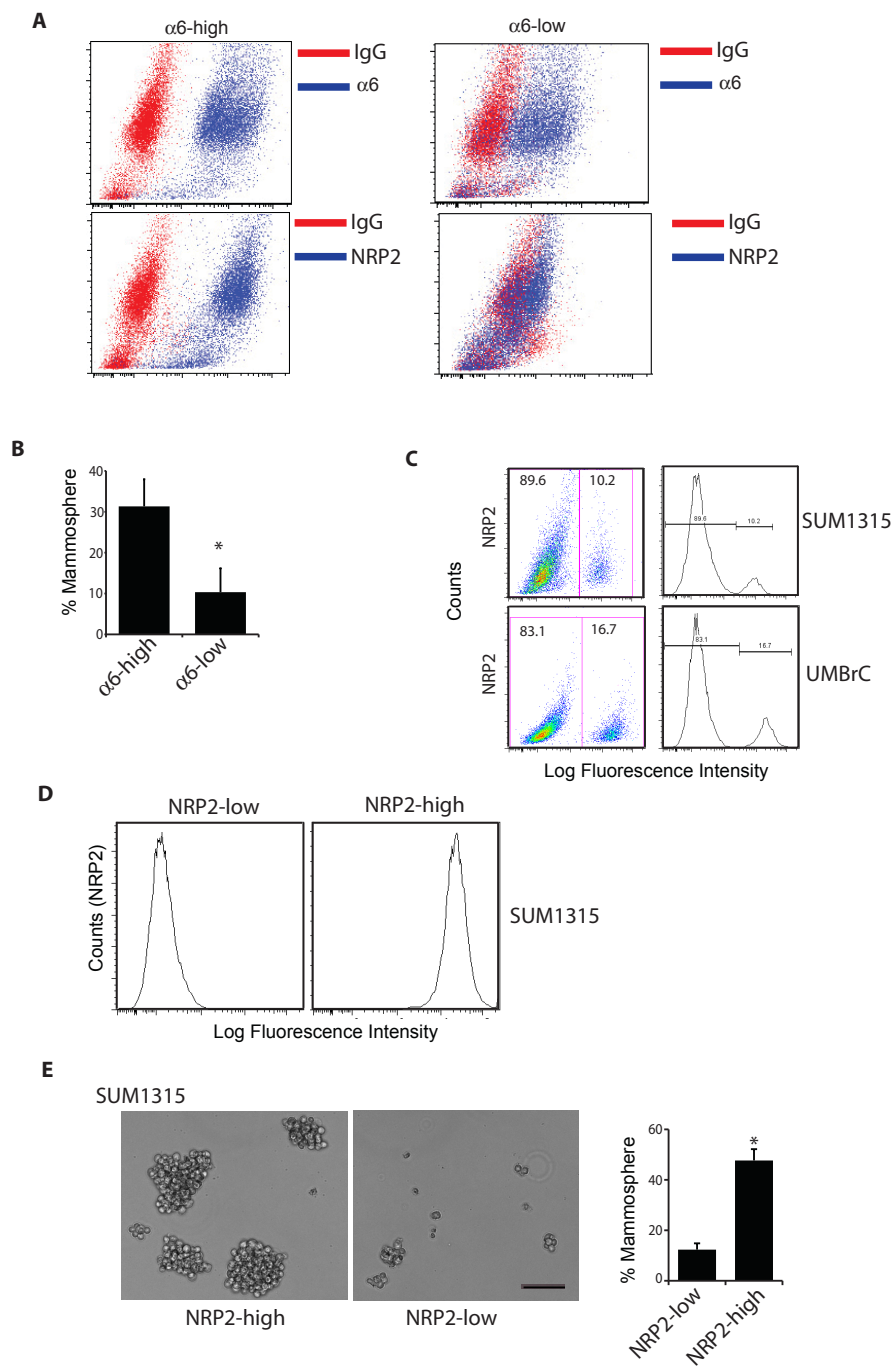

**Fig. S1.** (A) UMBrc cells sorted into either  $\alpha6^{\text{high}}$  or  $\alpha6^{\text{low}}$  populations were analyzed for expression of NRP2 and  $\alpha6$  using FACS analysis. (B) UMBrc cells sorted into either  $\alpha6^{\text{high}}$  or  $\alpha6^{\text{low}}$  populations were analyzed for their ability to form mammospheres. (C) NRP2<sup>high</sup> and NRP2<sup>low</sup> populations were sorted from SUM1315 and UMBrc cells by FACS using a NRP2 Ab. (D) SUM1315 cells sorted into NRP2<sup>high</sup> and NRP2<sup>low</sup> populations were re-analyzed for NRP2 surface expression using flow cytometry. (E) SUM1315 cells sorted into NRP2<sup>high</sup> and NRP2<sup>low</sup> populations were analyzed for their ability to form mammospheres (\*p=0.01). Scale bar = 100  $\mu\text{m}$ .
